# Supplementary material for: A comparative study of different metal acetylacetonates covalently anchored onto amine functionalized silica: a study of the oxidation of aldehydes and alcohols to corresponding acids in water
Source: Royal Society of Chemistry journal article supplement (doi:10.1039/c2gc35289c), 2012-01-01
Supplement: c2gc35289c.pdf [file c2gc35289c.pdf]

## Supporting Information

### **A comparative study of different metal acetylacetonates covalently anchored onto amine functionalized silica: A study of the oxidation of aldehydes and alcohols to corresponding acids in water**

Ravinderpal Kour Sodhi, Satya Paul\* and J. H. Clark

#### **Spectral data of the compounds**

**Benzoic acid (Table 3, Entry 1):**  $^1\text{H}$  NMR (DMSO- $d_6$ ):  $\delta$  7.45–7.64 (*m*, 3H,  $\text{H}_{\text{arom}}$ ), 8.13 (*d*, 2H,  $\text{H}_{\text{arom}}$ );  $^{13}\text{C}$  NMR (DMSO- $d_6$ ):  $\delta$  172.5, 133.8, 130.2, 128.4; IR ( $\nu_{\text{max}}$  in  $\text{cm}^{-1}$ ): 1670 (C=O stretch), 2950 (O-H stretch); ms ( $m/z$ ): 122 ( $\text{M}^+$ ).

**4-Methoxybenzoic acid (Table 3, Entry 2):**  $^1\text{H}$  NMR (DMSO- $d_6$ ):  $\delta$  3.79 (*s*, 3H,  $\text{OCH}_3$ ), 6.85 (*d*, 2H,  $\text{H}_{\text{arom}}$ ), 7.94 (*d*, 2H,  $\text{H}_{\text{arom}}$ );  $^{13}\text{C}$  NMR (DMSO- $d_6$ ):  $\delta$  168.7, 163.3, 131.8, 114.6, 55.2; IR ( $\nu_{\text{max}}$  in  $\text{cm}^{-1}$ ): 1690 (C=O stretch), 2995 (O-H stretch); ms ( $m/z$ ): 152 ( $\text{M}^+$ ).

**4-Chlorobenzoic acid (Table 3, Entry 3):**  $^1\text{H}$  NMR (DMSO- $d_6$ ):  $\delta$  7.56 (*d*, 2H,  $\text{H}_{\text{arom}}$ ), 7.93 (*d*, 2H,  $\text{H}_{\text{arom}}$ );  $^{13}\text{C}$  NMR (DMSO- $d_6$ ):  $\delta$  166.4, 137.8, 131.1, 129.6, 128.7; IR ( $\nu_{\text{max}}$  in  $\text{cm}^{-1}$ ): 1687 (C=O stretch), 2985 (O-H stretch); ms ( $m/z$ ): 156 ( $\text{M}^+$ ), 158 ( $\text{M}+2$ ).

**4-Bromobenzoic acid (Table 3, Entry 4):**  $^1\text{H}$  NMR (DMSO- $d_6$ ):  $\delta$  7.66 (*d*, 2H,  $\text{H}_{\text{arom}}$ ), 7.95 (*d*, 2H,  $\text{H}_{\text{arom}}$ );  $^{13}\text{C}$  NMR (DMSO- $d_6$ ):  $\delta$  165.4, 133.8, 131.1, 127.6, 128.7; IR ( $\nu_{\text{max}}$  in  $\text{cm}^{-1}$ ): 1685 (C=O stretch), 3010 (O-H stretch); ms ( $m/z$ ): 200 ( $\text{M}^+$ ), 202 ( $\text{M}+2$ ).

**Cinnamic acid (Table 3, Entry 5):**  $^1\text{H}$  NMR ( $\text{CDCl}_3$ ):  $\delta$  6.47 (*d*, 1H, =CH), 7.42-7.56 (*m*, 5H,  $\text{H}_{\text{arom}}$ ), 7.81 (*d*, 1H, =CH);  $^{13}\text{C}$  NMR ( $\text{DMSO-}d_6$ ):  $\delta$  170.6, 148.0, 135.2, 126.4, 115.6; IR ( $\nu_{\text{max}}$  in  $\text{cm}^{-1}$ ): 1667 (C=O stretch), 2885 (O-H stretch); ms (*m/z*): 148 ( $\text{M}^+$ ).

**Furan-2-carboxylic acid (Table 3, Entry 6):**  $^1\text{H}$  NMR ( $\text{DMSO-}d_6$ ):  $\delta$  6.49-6.99 (*m*, 2H,  $\text{H}_{\text{arom}}$ ), 7.58 (*dd*, 1H,  $\text{H}_{\text{arom}}$ );  $^{13}\text{C}$  NMR ( $\text{DMSO-}d_6$ ):  $\delta$  161.7, 148.2, 146.8, 120.7, 113.2; IR ( $\nu_{\text{max}}$  in  $\text{cm}^{-1}$ ): 1708 (C=O stretch), 3016 (O-H stretch); ms (*m/z*): 112 ( $\text{M}^+$ ).

**(Z)-3-Chloro-3-(4-methoxyphenyl)acrylic acid (Table 5, Entry 1):**  $^1\text{H}$  NMR ( $\text{CDCl}_3$ ):  $\delta$  3.85 (*s*, 3H,  $\text{OCH}_3$ ), 6.50 (*s*, 1H, =CH), 6.98 (*d*, 2H,  $\text{H}_{\text{arom}}$ ), 7.73 (*d*, 2H,  $\text{H}_{\text{arom}}$ );  $^{13}\text{C}$  NMR ( $\text{CDCl}_3$ ):  $\delta$  165.6, 162.1, 145.2, 129.3, 129.1, 113.1, 55.7; IR ( $\nu_{\text{max}}$  in  $\text{cm}^{-1}$ ): 1674 (C=O stretch), 2905 (O-H stretch); ms (*m/z*): 214 ( $\text{M}^+$ ), 216 ( $\text{M}+2$ ).

**(Z)-3-Chloro-3-(4-chlorophenyl)acrylic acid (Table 5, Entry 2):**  $^1\text{H}$  NMR ( $\text{CDCl}_3$ ):  $\delta$  6.62 (*s*, 1H, =CH), 7.44 (*d*, 2H,  $\text{H}_{\text{arom}}$ ), 7.65 (*d*, 2H,  $\text{H}_{\text{arom}}$ );  $^{13}\text{C}$  NMR ( $\text{CDCl}_3$ ):  $\delta$  165.9, 146.5, 135.1, 129.2, 127.5, 115.3; IR ( $\nu_{\text{max}}$  in  $\text{cm}^{-1}$ ): 1672 (C=O stretch), 2890 (O-H stretch); ms (*m/z*): 216 ( $\text{M}^+$ ), 218 ( $\text{M}+2$ ).

**(Z)-3-Chloro-3-(4-nitrophenyl)acrylic acid (Table 5, Entry 3):**  $^1\text{H}$  NMR ( $\text{CDCl}_3$ ):  $\delta$  6.85 (*s*, 1H, =CH), 7.78 (*d*, 2H,  $\text{H}_{\text{arom}}$ ), 7.98 (*d*, 2H,  $\text{H}_{\text{arom}}$ );  $^{13}\text{C}$  NMR ( $\text{DMSO-}d_6$ ):  $\delta$  165.1, 146.2, 143.5, 126.5, 121.5, 110.6; IR ( $\nu_{\text{max}}$  in  $\text{cm}^{-1}$ ): 1680 (C=O stretch), 2877 (O-H stretch); ms (*m/z*): 227 ( $\text{M}^+$ ), 229 ( $\text{M}+2$ ).

**2-Chloroquinoline-3-carboxylic acid (Table 5, Entry 4):**  $^1\text{H}$  NMR ( $\text{DMSO-}d_6$ ):  $\delta$  7.43-7.68 (*m*, 3H,  $\text{H}_{\text{arom}}$ ), 8.05-8.71 (*d*, 2H,  $\text{H}_{\text{arom}}$ );  $^{13}\text{C}$  NMR ( $\text{DMSO-}d_6$ ):  $\delta$  169.4, 151.7, 149.1, 140,

133.4, 129.4, 127.6, 125.3; IR ( $\nu_{\max}$  in  $\text{cm}^{-1}$ ): 1720 (C=O stretch), 2925 (O-H stretch); ms (m/z): 207 ( $\text{M}^+$ ), 209 ( $\text{M}+2$ ).

**4-Nitrobenzoic acid (Table 5, Entry 5):**  $^1\text{H}$  NMR (DMSO- $d_6$ ):  $\delta$  8.15-8.30 (*m*, 4H,  $\text{H}_{\text{arom}}$ );  $^{13}\text{C}$  NMR (DMSO- $d_6$ ):  $\delta$  165.8, 150.0, 136.4, 130.7, 123.7; IR ( $\nu_{\max}$  in  $\text{cm}^{-1}$ ): 1695 (C=O stretch), 3116 (O-H stretch); ms (m/z): 166 ( $\text{M}^+$ ).

**2-Nitrobenzoic acid (Table 5, Entry 6):**  $^1\text{H}$ -NMR (DMSO- $d_6$ ):  $\delta$  7.74-7.97 (*m*, 4H,  $\text{H}_{\text{arom}}$ );  $^{13}\text{C}$  NMR (DMSO- $d_6$ ):  $\delta$  165.9, 148.4, 133.1, 132.4, 129.9, 127.3, 123.7; IR ( $\nu_{\max}$  in  $\text{cm}^{-1}$ ): 1683 (C=O stretch), 2888 (O-H stretch); ms (m/z): 166 ( $\text{M}^+$ ).

**4-Hydroxybenzoic acid (Table 5, Entry 7):**  $^1\text{H}$  NMR (DMSO- $d_6$ ):  $\delta$  6.83 (*d*, 2H,  $\text{H}_{\text{arom}}$ ), 7.80 (*d*, 2H,  $\text{H}_{\text{arom}}$ );  $^{13}\text{C}$  NMR (DMSO- $d_6$ ):  $\delta$  169.4, 163.7, 131.7, 122.9, 115.8; IR ( $\nu_{\max}$  in  $\text{cm}^{-1}$ ): 1688 (C=O stretch), 2921 (O-H stretch); ms (m/z): 138 ( $\text{M}^+$ ).

**2-Hydroxybenzoic acid (Table 5, Entry 8):**  $^1\text{H}$  NMR (DMSO- $d_6$ ):  $\delta$  6.80–6.95 (*m*, 2H,  $\text{H}_{\text{arom}}$ ), 7.45–7.82 (*m*, 2H,  $\text{H}_{\text{arom}}$ );  $^{13}\text{C}$  NMR (DMSO- $d_6$ ):  $\delta$  172.1, 161.5, 135.2, 130.2, 118.7, 116.9, 112.7; IR ( $\nu_{\max}$  in  $\text{cm}^{-1}$ ): 1678 (C=O stretch), 2905 (O-H stretch); ms (m/z): 138 ( $\text{M}^+$ ).

**2,4-Dichlorobenzoic acid (Table 5, Entry 9):**  $^1\text{H}$  NMR (DMSO- $d_6$ ):  $\delta$  6.58 (*d*, 1H,  $\text{H}_{\text{arom}}$ ), 7.01-7.44 (*m*, 2H,  $\text{H}_{\text{arom}}$ );  $^{13}\text{C}$  NMR (DMSO- $d_6$ ):  $\delta$  169.7, 139.4, 136.2, 133.6, 131.5, 127.0, 126.8; IR ( $\nu_{\max}$  in  $\text{cm}^{-1}$ ): 1688 (C=O stretch), 2895 (O-H stretch); ms (m/z): 191 ( $\text{M}^+$ ), 193 ( $\text{M}+2$ ).

**3-Nitrobenzoic acid (Table 5, Entry 10):**  $^1\text{H}$  NMR (DMSO- $d_6$ ):  $\delta$  7.77-8.45 (*m*, 4H,  $\text{H}_{\text{arom}}$ );  $^{13}\text{C}$  NMR (DMSO- $d_6$ ):  $\delta$  165.9, 148.4, 133.1, 132.4, 129.9, 127.3, 123.7; IR ( $\nu_{\max}$  in  $\text{cm}^{-1}$ ): 1710 (C=O stretch), 2925 (O-H stretch); ms (m/z): 167 ( $\text{M}^+$ ).

**3,4,5-Trimethoxybenzoic acid (Table 5, Entry 11):**  $^1\text{H}$  NMR (DMSO- $d_6$ ):  $\delta$  3.79 (*s*, 3H, OCH<sub>3</sub>), 3.94 (*s*, 6H, 2  $\times$  OCH<sub>3</sub>), 7.18 (*s*, 2H, H<sub>arom</sub>);  $^{13}\text{C}$  NMR (DMSO- $d_6$ ):  $\delta$  169.4, 150.7, 144.4, 56.5, 56.2; IR ( $\nu_{\text{max}}$  in  $\text{cm}^{-1}$ ): 1680 (C=O stretch), 3005 (O-H stretch); ms ( $m/z$ ): 212 ( $\text{M}^+$ ).

**Butyric acid (Table 5, Entry 12):**  $^1\text{H}$  NMR (DMSO- $d_6$ ):  $\delta$  0.92 (*t*, 3H, CH<sub>3</sub>), 1.60 (*m*, 2H, CH<sub>2</sub>), 2.25 (*t*, 2H, CH<sub>2</sub>);  $^{13}\text{C}$  NMR (DMSO- $d_6$ ):  $\delta$  177, 37.5, 18.1, 13.2; IR ( $\nu_{\text{max}}$  in  $\text{cm}^{-1}$ ): 1705 (C=O stretch), 2995 (O-H stretch); ms ( $m/z$ ): 88 ( $\text{M}^+$ ).

**Glutaric acid (Table 5, Entry 13):**  $^1\text{H}$  NMR (DMSO- $d_6$ ):  $\delta$  1.65 (*m*, 2H, CH<sub>2</sub>), 2.25-2.42 (*t*, 4H, -CH<sub>2</sub>);  $^{13}\text{C}$  NMR (DMSO- $d_6$ ):  $\delta$  177, 37.5, 18.1, 13.2; IR ( $\nu_{\text{max}}$  in  $\text{cm}^{-1}$ ): 1715 (C=O stretch), 3010 (O-H stretch); ms ( $m/z$ ): 132 ( $\text{M}^+$ ).

**2-Methoxybenzoic acid (Table 5, Entry 14):**  $^1\text{H}$  NMR (CDCl<sub>3</sub>):  $\delta$  3.98 (*s*, 3H, OCH<sub>3</sub>), 6.73-7.11 (*m*, 2H, H<sub>arom</sub>), 7.49-8.02 (*m*, 2H, H<sub>arom</sub>);  $^{13}\text{C}$  NMR (DMSO- $d_6$ ):  $\delta$  166, 158.3, 135.1, 133.4, 121.8, 117.5, 111.8, 56.6; IR ( $\nu_{\text{max}}$  in  $\text{cm}^{-1}$ ): 1690 (C=O stretch), 2995 (O-H stretch); ms ( $m/z$ ): 152 ( $\text{M}^+$ ).
